# Supplementary material
Source: publisher site journal article supplement (https://www.dovepress.com/article/409643)
Supplement: Supplementary file 1 [file get_supplementary_file.php]

**Appendix 1: Background information of the study districts**

| District | Male | Female | total | totperthous | area | density | Urban | clinic | feprop | pharmacy | Income | older |
| --- | --- | --- | --- | --- | --- | --- | --- | --- | --- | --- | --- | --- |
| 001 | 270821 | 286293 | 557114 | 557.11 | 23.14 | 24078.61 | 1 | 290 | 0.51 | 205 | 659 | 0.16 |
| 002 | 188897 | 196431 | 385328 | 385.33 | 16.32 | 23615.13 | 1 | 186 | 0.51 | 177 | 601 | 0.16 |
| 003 | 198830 | 212384 | 411214 | 411.21 | 20.14 | 20413.72 | 1 | 169 | 0.52 | 143 | 662 | 0.18 |
| 004 | 103903 | 115461 | 219364 | 219.36 | 5.71 | 38391.96 | 1 | 136 | 0.53 | 89 | 713 | 0.20 |
| 005 | 205901 | 216752 | 422653 | 422.65 | 19.74 | 21412.84 | 1 | 194 | 0.51 | 158 | 627 | 0.13 |
| 006 | 145552 | 157980 | 303532 | 303.53 | 120.23 | 2524.69 | 1 | 106 | 0.52 | 72 | 683 | 0.19 |
| 007 | 91392 | 92078 | 183470 | 183.47 | 33.13 | 5538.08 | 1 | 51 | 0.50 | 54 | 610 | 0.13 |
| 008 | 43910 | 43764 | 87674 | 87.67 | 21.12 | 4150.29 | 1 | 28 | 0.50 | 23 | 586 | 0.13 |
| 009 | 58409 | 58508 | 116917 | 116.92 | 191.45 | 610.69 | 1 | 41 | 0.50 | 39 | 628 | 0.13 |
| 010 | 87638 | 95640 | 183278 | 183.28 | 70.66 | 2593.93 | 1 | 52 | 0.52 | 43 | 664 | 0.16 |
| 011 | 100104 | 105743 | 205847 | 205.85 | 71.24 | 2889.67 | 1 | 74 | 0.51 | 62 | 661 | 0.15 |
| 012 | 19730 | 19347 | 39077 | 39.08 | 70.73 | 552.45 | 1 | 14 | 0.50 | 18 | 537 | 0.19 |
| 013 | 117117 | 121160 | 238277 | 238.28 | 29.56 | 8061.39 | 1 | 89 | 0.51 | 87 | 605 | 0.13 |
| 014 | 99113 | 103343 | 202456 | 202.46 | 7.44 | 27229.76 | 1 | 113 | 0.51 | 75 | 609 | 0.12 |
| 015 | 44983 | 44487 | 89470 | 89.47 | 34.86 | 2566.32 | 1 | 16 | 0.50 | 24 | 589 | 0.12 |
| 016 | 38686 | 39726 | 78412 | 78.41 | 19.16 | 4092.42 | 1 | 31 | 0.51 | 19 | 644 | 0.13 |
| 017 | 58911 | 62281 | 121192 | 121.19 | 54.15 | 2238.00 | 1 | 44 | 0.51 | 37 | 788 | 0.12 |
| 018 | 11850 | 11873 | 23723 | 23.72 | 20.58 | 1152.79 | 1 | 9 | 0.50 | 7 | 630 | 0.16 |
| 019 | 4130 | 3435 | 7565 | 7.57 | 144.35 | 52.41 | 0 | 1 | 0.45 | 1 | 542 | 0.23 |
| 020 | 3649 | 3054 | 6703 | 6.70 | 170.84 | 39.24 | 0 | 1 | 0.46 | 0 | 578 | 0.27 |
| 021 | 11575 | 10965 | 22540 | 22.54 | 65.99 | 341.56 | 1 | 4 | 0.49 | 4 | 507 | 0.19 |
| 022 | 5973 | 5507 | 11480 | 11.48 | 51.26 | 223.94 | 0 | 2 | 0.48 | 1 | 519 | 0.18 |
| 023 | 19801 | 19940 | 39741 | 39.74 | 39.49 | 1006.27 | 1 | 9 | 0.50 | 8 | 584 | 0.14 |
| 024 | 2473 | 1951 | 4424 | 4.42 | 71.34 | 62.01 | 0 | 2 | 0.44 | 0 | 540 | 0.31 |
| 025 | 4592 | 3876 | 8468 | 8.47 | 146.25 | 57.90 | 0 | 4 | 0.46 | 2 | 532 | 0.28 |
| 026 | 6025 | 5757 | 11782 | 11.78 | 99.97 | 117.85 | 0 | 2 | 0.49 | 1 | 524 | 0.23 |
| 027 | 10394 | 10733 | 21127 | 21.13 | 49.21 | 429.30 | 1 | 4 | 0.51 | 4 | 515 | 0.17 |
| 028 | 10865 | 10845 | 21710 | 21.71 | 63.38 | 342.56 | 1 | 3 | 0.50 | 2 | 538 | 0.20 |
| 029 | 3131 | 3285 | 6416 | 6.42 | 321.13 | 19.98 | 0 | 3 | 0.51 | 0 | 624 | 0.15 |
| 030 | 93573 | 106743 | 200316 | 200.32 | 9.29 | 21567.65 | 1 | 137 | 0.53 | 70 | 830 | 0.20 |
| 031 | 102171 | 113069 | 215240 | 215.24 | 11.21 | 19204.65 | 1 | 135 | 0.53 | 81 | 749 | 0.21 |
| 032 | 140899 | 161745 | 302644 | 302.64 | 11.36 | 26637.91 | 1 | 442 | 0.53 | 94 | 880 | 0.21 |
| 033 | 103720 | 120156 | 223876 | 223.88 | 13.68 | 16362.69 | 1 | 253 | 0.54 | 99 | 752 | 0.20 |
| 034 | 73952 | 81445 | 155397 | 155.40 | 7.61 | 20427.89 | 1 | 125 | 0.52 | 63 | 837 | 0.19 |
| 035 | 60026 | 63823 | 123849 | 123.85 | 5.68 | 21798.64 | 1 | 69 | 0.52 | 35 | 679 | 0.19 |
| 036 | 89578 | 93510 | 183088 | 183.09 | 8.85 | 20682.77 | 1 | 84 | 0.51 | 60 | 637 | 0.21 |
| 037 | 128096 | 140034 | 268130 | 268.13 | 31.51 | 8509.63 | 1 | 85 | 0.52 | 65 | 785 | 0.17 |
| 038 | 57916 | 60842 | 118758 | 118.76 | 21.84 | 5437.04 | 1 | 40 | 0.51 | 34 | 724 | 0.17 |
| 039 | 134624 | 147901 | 282525 | 282.53 | 31.58 | 8946.70 | 1 | 126 | 0.52 | 65 | 805 | 0.15 |
| 040 | 134007 | 144444 | 278451 | 278.45 | 62.37 | 4464.63 | 1 | 138 | 0.52 | 87 | 722 | 0.20 |
| 041 | 120056 | 130088 | 250144 | 250.14 | 56.82 | 4402.27 | 1 | 102 | 0.52 | 71 | 725 | 0.18 |
| 042 | 221049 | 236196 | 457245 | 457.25 | 34.80 | 13137.49 | 1 | 262 | 0.52 | 174 | 718 | 0.13 |
| 043 | 206991 | 215480 | 422471 | 422.47 | 76.52 | 5521.05 | 1 | 195 | 0.51 | 198 | 699 | 0.13 |
| 044 | 48618 | 47046 | 95664 | 95.66 | 105.12 | 910.04 | 1 | 19 | 0.49 | 24 | 603 | 0.15 |
| 045 | 87889 | 87253 | 175142 | 175.14 | 89.12 | 1965.17 | 1 | 43 | 0.50 | 53 | 658 | 0.12 |
| 046 | 82635 | 84425 | 167060 | 167.06 | 75.50 | 2212.64 | 1 | 57 | 0.51 | 60 | 745 | 0.11 |
| 047 | 47773 | 46114 | 93887 | 93.89 | 87.39 | 1074.31 | 1 | 24 | 0.49 | 26 | 629 | 0.13 |
| 048 | 81565 | 82833 | 164398 | 164.40 | 72.02 | 2282.74 | 1 | 63 | 0.50 | 63 | 671 | 0.13 |
| 049 | 104026 | 105176 | 209202 | 209.20 | 33.71 | 6205.73 | 1 | 60 | 0.50 | 72 | 646 | 0.13 |
| 050 | 61998 | 62410 | 124408 | 124.41 | 75.23 | 1653.61 | 1 | 39 | 0.50 | 37 | 657 | 0.14 |
| 051 | 113137 | 115474 | 228611 | 228.61 | 47.75 | 4787.34 | 1 | 36 | 0.51 | 66 | 671 | 0.13 |
| 052 | 26218 | 23115 | 49333 | 49.33 | 85.02 | 580.27 | 1 | 6 | 0.47 | 8 | 595 | 0.18 |
| 053 | 35719 | 33313 | 69032 | 69.03 | 87.98 | 784.63 | 1 | 8 | 0.48 | 17 | 611 | 0.13 |
| 054 | 6658 | 5696 | 12354 | 12.35 | 350.78 | 35.22 | 0 | 5 | 0.46 | 1 | 596 | 0.13 |
| 055 | 8992 | 9176 | 18168 | 18.17 | 0.88 | 20638.42 | 1 | 35 | 0.51 | 22 | 562 | 0.19 |
| 056 | 37564 | 38349 | 75913 | 75.91 | 9.29 | 8175.43 | 1 | 39 | 0.51 | 35 | 593 | 0.16 |
| 057 | 60596 | 66173 | 126769 | 126.77 | 6.81 | 18614.85 | 1 | 71 | 0.52 | 45 | 678 | 0.13 |
| 058 | 54258 | 60325 | 114583 | 114.58 | 5.70 | 20087.48 | 1 | 174 | 0.53 | 63 | 671 | 0.17 |
| 059 | 69849 | 76741 | 146590 | 146.59 | 6.94 | 21129.79 | 1 | 129 | 0.52 | 88 | 616 | 0.17 |
| 060 | 110906 | 120824 | 231730 | 231.73 | 39.85 | 5815.54 | 1 | 205 | 0.52 | 103 | 729 | 0.12 |
| 061 | 84068 | 91994 | 176062 | 176.06 | 31.26 | 5632.58 | 1 | 178 | 0.52 | 69 | 761 | 0.10 |
| 062 | 137090 | 150254 | 287344 | 287.34 | 62.70 | 4582.59 | 1 | 156 | 0.52 | 112 | 653 | 0.13 |
| 063 | 81832 | 84221 | 166053 | 166.05 | 41.18 | 4031.93 | 1 | 127 | 0.51 | 80 | 587 | 0.15 |
| 064 | 25194 | 23975 | 49169 | 49.17 | 117.41 | 418.79 | 1 | 30 | 0.49 | 23 | 552 | 0.21 |
| 065 | 38215 | 37915 | 76130 | 76.13 | 58.52 | 1300.94 | 1 | 44 | 0.50 | 37 | 572 | 0.15 |
| 066 | 44923 | 43086 | 88009 | 88.01 | 64.17 | 1371.48 | 1 | 36 | 0.49 | 20 | 579 | 0.15 |
| 067 | 47903 | 47323 | 95226 | 95.23 | 40.46 | 2353.56 | 1 | 46 | 0.50 | 29 | 653 | 0.12 |
| 068 | 29670 | 29603 | 59273 | 59.27 | 16.60 | 3569.61 | 1 | 10 | 0.50 | 17 | 613 | 0.13 |
| 069 | 27520 | 26823 | 54343 | 54.34 | 58.94 | 921.94 | 1 | 26 | 0.49 | 17 | 587 | 0.16 |
| 070 | 33369 | 32160 | 65529 | 65.53 | 35.04 | 1869.88 | 1 | 16 | 0.49 | 15 | 553 | 0.14 |
| 071 | 53932 | 55377 | 109309 | 109.31 | 25.85 | 4228.64 | 1 | 47 | 0.51 | 28 | 598 | 0.12 |
| 072 | 47604 | 48089 | 95693 | 95.69 | 32.41 | 2952.49 | 1 | 35 | 0.50 | 30 | 606 | 0.11 |
| 073 | 12431 | 11633 | 24064 | 24.06 | 68.89 | 349.32 | 1 | 9 | 0.48 | 7 | 562 | 0.20 |
| 074 | 7558 | 7112 | 14670 | 14.67 | 18.21 | 805.58 | 1 | 2 | 0.48 | 2 | 564 | 0.19 |
| 075 | 16280 | 15660 | 31940 | 31.94 | 42.41 | 753.13 | 1 | 5 | 0.49 | 5 | 593 | 0.15 |
| 076 | 9956 | 8908 | 18864 | 18.86 | 27.40 | 688.35 | 1 | 1 | 0.47 | 2 | 658 | 0.18 |
| 077 | 38241 | 38253 | 76494 | 76.49 | 43.40 | 1762.40 | 1 | 31 | 0.50 | 28 | 610 | 0.13 |
| 078 | 28903 | 27874 | 56777 | 56.78 | 37.00 | 1534.41 | 1 | 19 | 0.49 | 17 | 582 | 0.15 |
| 079 | 39225 | 38870 | 78095 | 78.10 | 38.04 | 2053.09 | 1 | 25 | 0.50 | 19 | 604 | 0.12 |
| 080 | 32932 | 32162 | 65094 | 65.09 | 98.08 | 663.70 | 1 | 25 | 0.49 | 19 | 558 | 0.16 |
| 081 | 96285 | 98685 | 194970 | 194.97 | 120.75 | 1614.69 | 1 | 83 | 0.51 | 83 | 573 | 0.13 |
| 082 | 104346 | 108771 | 213117 | 213.12 | 28.88 | 7380.47 | 1 | 96 | 0.51 | 88 | 588 | 0.12 |
| 083 | 5794 | 5015 | 10809 | 10.81 | 1037.82 | 10.42 | 0 | 5 | 0.46 | 3 | 536 | 0.18 |
| 084 | 37715 | 38616 | 76331 | 76.33 | 38.54 | 1980.64 | 1 | 66 | 0.51 | 47 | 655 | 0.18 |
| 085 | 13016 | 11985 | 25001 | 25.00 | 52.25 | 478.53 | 1 | 11 | 0.48 | 8 | 575 | 0.21 |
| 086 | 14240 | 13005 | 27245 | 27.25 | 126.40 | 215.54 | 0 | 15 | 0.48 | 12 | 566 | 0.26 |
| 087 | 10824 | 10002 | 20826 | 20.83 | 61.29 | 339.78 | 1 | 2 | 0.48 | 4 | 603 | 0.22 |
| 088 | 11813 | 10942 | 22755 | 22.76 | 72.22 | 315.08 | 1 | 8 | 0.48 | 7 | 597 | 0.26 |
| 089 | 10715 | 9437 | 20152 | 20.15 | 124.92 | 161.32 | 0 | 7 | 0.47 | 4 | 550 | 0.25 |
| 090 | 22196 | 21517 | 43713 | 43.71 | 53.97 | 809.88 | 1 | 30 | 0.49 | 20 | 616 | 0.20 |
| 091 | 12125 | 11327 | 23452 | 23.45 | 33.53 | 699.45 | 1 | 8 | 0.48 | 7 | 593 | 0.22 |
| 092 | 11208 | 10460 | 21668 | 21.67 | 67.55 | 320.78 | 1 | 11 | 0.48 | 13 | 601 | 0.20 |
| 093 | 10773 | 10439 | 21212 | 21.21 | 70.80 | 299.62 | 1 | 5 | 0.49 | 5 | 607 | 0.18 |
| 094 | 4965 | 4235 | 9200 | 9.20 | 70.31 | 130.84 | 0 | 3 | 0.46 | 2 | 541 | 0.27 |
| 095 | 29051 | 29734 | 58785 | 58.79 | 38.94 | 1509.54 | 1 | 40 | 0.51 | 27 | 615 | 0.17 |
| 096 | 12954 | 12339 | 25293 | 25.29 | 53.99 | 468.46 | 1 | 9 | 0.49 | 9 | 581 | 0.19 |
| 097 | 12370 | 12152 | 24522 | 24.52 | 33.77 | 726.22 | 1 | 5 | 0.50 | 5 | 561 | 0.18 |
| 098 | 11478 | 10664 | 22142 | 22.14 | 110.15 | 201.02 | 0 | 4 | 0.48 | 2 | 538 | 0.21 |
| 099 | 9709 | 9364 | 19073 | 19.07 | 41.98 | 454.34 | 1 | 4 | 0.49 | 3 | 542 | 0.23 |
| 100 | 5327 | 5274 | 10601 | 10.60 | 44.10 | 240.38 | 0 | 2 | 0.50 | 3 | 558 | 0.20 |
| 101 | 21989 | 21328 | 43317 | 43.32 | 62.06 | 698.01 | 1 | 20 | 0.49 | 19 | 591 | 0.18 |
| 102 | 25588 | 25226 | 50814 | 50.81 | 55.31 | 918.72 | 1 | 26 | 0.50 | 21 | 746 | 0.15 |
| 103 | 18882 | 18778 | 37660 | 37.66 | 47.81 | 787.71 | 1 | 16 | 0.50 | 11 | 646 | 0.14 |
| 104 | 15630 | 14744 | 30374 | 30.37 | 31.27 | 971.35 | 1 | 7 | 0.49 | 4 | 608 | 0.16 |
| 105 | 3757 | 3371 | 7128 | 7.13 | 27.88 | 255.69 | 0 | 2 | 0.47 | 1 | 566 | 0.22 |
| 106 | 7038 | 6564 | 13602 | 13.60 | 76.37 | 178.12 | 0 | 7 | 0.48 | 7 | 569 | 0.24 |
| 107 | 4825 | 4353 | 9178 | 9.18 | 109.63 | 83.72 | 0 | 2 | 0.47 | 2 | 536 | 0.24 |
| 108 | 4528 | 3870 | 8398 | 8.40 | 171.52 | 48.96 | 0 | 2 | 0.46 | 0 | 564 | 0.24 |
| 109 | 2582 | 1987 | 4569 | 4.57 | 74.90 | 61.00 | 0 | 2 | 0.43 | 1 | 527 | 0.29 |
| 110 | 38566 | 37819 | 76385 | 76.39 | 50.77 | 1504.64 | 1 | 28 | 0.50 | 24 | 636 | 0.15 |
| 111 | 34443 | 33721 | 68164 | 68.16 | 55.79 | 1221.77 | 1 | 36 | 0.49 | 20 | 632 | 0.14 |
| 112 | 17424 | 16517 | 33941 | 33.94 | 53.64 | 632.74 | 1 | 10 | 0.49 | 10 | 582 | 0.20 |
| 113 | 2040 | 1728 | 3768 | 3.77 | 64.08 | 58.80 | 0 | 1 | 0.46 | 0 | 541 | 0.29 |
| 114 | 115535 | 119880 | 235415 | 235.42 | 40.28 | 5845.15 | 1 | 116 | 0.51 | 97 | 662 | 0.12 |
| 115 | 88360 | 96598 | 184958 | 184.96 | 13.42 | 13786.79 | 1 | 137 | 0.52 | 91 | 721 | 0.15 |
| 116 | 61025 | 62764 | 123789 | 123.79 | 27.27 | 4539.70 | 1 | 73 | 0.51 | 46 | 591 | 0.18 |
| 117 | 63021 | 67073 | 130094 | 130.09 | 10.43 | 12468.28 | 1 | 110 | 0.52 | 65 | 675 | 0.17 |
| 118 | 98431 | 97192 | 195623 | 195.62 | 107.20 | 1824.81 | 1 | 75 | 0.50 | 53 | 606 | 0.12 |
| 119 | 31831 | 35382 | 67213 | 67.21 | 11.07 | 6073.67 | 1 | 35 | 0.53 | 30 | 663 | 0.12 |
| 120 | 37895 | 40661 | 78556 | 78.56 | 6.26 | 12548.88 | 1 | 99 | 0.52 | 50 | 655 | 0.19 |
| 121 | 11636 | 11917 | 23553 | 23.55 | 1.42 | 16632.30 | 1 | 18 | 0.51 | 16 | 568 | 0.24 |
| 122 | 67965 | 73523 | 141488 | 141.49 | 14.75 | 9590.91 | 1 | 82 | 0.52 | 46 | 709 | 0.16 |
| 123 | 94355 | 102951 | 197306 | 197.31 | 19.38 | 10179.70 | 1 | 192 | 0.52 | 87 | 727 | 0.14 |
| 124 | 92502 | 96924 | 189426 | 189.43 | 25.83 | 7334.25 | 1 | 98 | 0.51 | 62 | 681 | 0.13 |
| 125 | 162409 | 174459 | 336868 | 336.87 | 19.79 | 17025.06 | 1 | 251 | 0.52 | 136 | 661 | 0.17 |
| 126 | 24227 | 26263 | 50490 | 50.49 | 1.98 | 25546.45 | 1 | 94 | 0.52 | 24 | 659 | 0.23 |
| 127 | 12603 | 14065 | 26668 | 26.67 | 1.86 | 14358.48 | 1 | 42 | 0.53 | 10 | 672 | 0.25 |
| 128 | 80039 | 87241 | 167280 | 167.28 | 8.15 | 20519.61 | 1 | 142 | 0.52 | 87 | 655 | 0.21 |
| 129 | 90961 | 94867 | 185828 | 185.83 | 19.12 | 9718.68 | 1 | 100 | 0.51 | 64 | 640 | 0.18 |
| 130 | 14306 | 13479 | 27785 | 27.79 | 1.46 | 18980.12 | 1 | 5 | 0.49 | 7 | 556 | 0.18 |
| 131 | 77861 | 79495 | 157356 | 157.36 | 45.44 | 3462.74 | 1 | 53 | 0.51 | 47 | 649 | 0.14 |
| 132 | 175456 | 184120 | 359576 | 359.58 | 26.76 | 13437.57 | 1 | 197 | 0.51 | 130 | 645 | 0.15 |
| 133 | 34940 | 34538 | 69478 | 69.48 | 32.29 | 2151.95 | 1 | 23 | 0.50 | 20 | 621 | 0.15 |
| 134 | 57282 | 54983 | 112265 | 112.27 | 71.04 | 1580.31 | 1 | 36 | 0.49 | 30 | 581 | 0.15 |
| 135 | 21360 | 20404 | 41764 | 41.76 | 66.98 | 623.52 | 1 | 16 | 0.49 | 14 | 575 | 0.18 |
| 136 | 17411 | 16913 | 34324 | 34.32 | 26.58 | 1291.11 | 1 | 17 | 0.49 | 9 | 602 | 0.16 |
| 137 | 46370 | 45523 | 91893 | 91.89 | 36.08 | 2546.87 | 1 | 33 | 0.50 | 27 | 647 | 0.13 |
| 138 | 22653 | 22285 | 44938 | 44.94 | 24.59 | 1827.29 | 1 | 7 | 0.50 | 7 | 702 | 0.18 |
| 139 | 47941 | 48900 | 96841 | 96.84 | 47.94 | 2019.96 | 1 | 62 | 0.50 | 28 | 621 | 0.16 |
| 140 | 19609 | 19346 | 38955 | 38.96 | 25.94 | 1501.86 | 1 | 10 | 0.50 | 13 | 653 | 0.18 |
| 141 | 15529 | 13964 | 29493 | 29.49 | 65.40 | 451.00 | 1 | 10 | 0.47 | 8 | 576 | 0.18 |
| 142 | 3827 | 3092 | 6919 | 6.92 | 92.68 | 74.65 | 0 | 1 | 0.45 | 0 | 530 | 0.29 |
| 143 | 14284 | 14047 | 28331 | 28.33 | 34.62 | 818.43 | 1 | 10 | 0.50 | 10 | 574 | 0.17 |
| 144 | 26258 | 25468 | 51726 | 51.73 | 48.43 | 1067.95 | 1 | 25 | 0.49 | 20 | 619 | 0.17 |
| 145 | 15193 | 14689 | 29882 | 29.88 | 20.16 | 1482.13 | 1 | 9 | 0.49 | 11 | 583 | 0.16 |
| 146 | 15349 | 14611 | 29960 | 29.96 | 15.76 | 1900.73 | 1 | 12 | 0.49 | 8 | 535 | 0.18 |
| 147 | 6874 | 6831 | 13705 | 13.71 | 22.61 | 606.04 | 1 | 3 | 0.50 | 0 | 587 | 0.15 |
| 148 | 9653 | 9219 | 18872 | 18.87 | 14.78 | 1277.10 | 1 | 5 | 0.49 | 7 | 546 | 0.18 |
| 149 | 18262 | 17255 | 35517 | 35.52 | 11.60 | 3062.68 | 1 | 15 | 0.49 | 9 | 568 | 0.16 |
| 150 | 18387 | 17377 | 35764 | 35.76 | 94.61 | 378.01 | 1 | 29 | 0.49 | 21 | 574 | 0.22 |
| 151 | 20288 | 18323 | 38611 | 38.61 | 120.03 | 321.67 | 1 | 11 | 0.47 | 15 | 603 | 0.27 |
| 152 | 6700 | 5691 | 12391 | 12.39 | 194.16 | 63.82 | 0 | 3 | 0.46 | 8 | 536 | 0.23 |
| 153 | 3106 | 2771 | 5877 | 5.88 | 124.03 | 47.38 | 0 | 1 | 0.47 | 4 | 510 | 0.22 |
| 154 | 6289 | 5252 | 11541 | 11.54 | 104.00 | 110.97 | 0 | 3 | 0.46 | 5 | 536 | 0.24 |
| 155 | 7558 | 6418 | 13976 | 13.98 | 95.62 | 146.16 | 0 | 3 | 0.46 | 5 | 532 | 0.24 |
| 156 | 960 | 955 | 1915 | 1.92 | 194.00 | 9.87 | 0 | 1 | 0.50 | 0 | 653 | 0.09 |
| 157 | 2218 | 2005 | 4223 | 4.22 | 928.98 | 4.55 | 0 | 1 | 0.47 | 1 | 618 | 0.08 |
| 158 | 1622 | 1525 | 3147 | 3.15 | 252.99 | 12.44 | 0 | 2 | 0.48 | 0 | 656 | 0.09 |
| 159 | 46413 | 48982 | 95395 | 95.40 | 29.41 | 3243.85 | 1 | 58 | 0.51 | 50 | 634 | 0.16 |
| 160 | 33716 | 37768 | 71484 | 71.48 | 11.34 | 6301.04 | 1 | 68 | 0.53 | 52 | 608 | 0.17 |
| 161 | 19813 | 19051 | 38864 | 38.86 | 89.02 | 436.58 | 1 | 12 | 0.49 | 13 | 568 | 0.20 |
| 162 | 14816 | 14003 | 28819 | 28.82 | 100.89 | 285.64 | 0 | 9 | 0.49 | 13 | 549 | 0.18 |
| 163 | 18253 | 17021 | 35274 | 35.27 | 101.43 | 347.77 | 1 | 7 | 0.48 | 8 | 572 | 0.18 |
| 164 | 12789 | 11577 | 24366 | 24.37 | 38.48 | 633.26 | 1 | 4 | 0.48 | 2 | 579 | 0.17 |
| 165 | 17001 | 15257 | 32258 | 32.26 | 111.91 | 288.25 | 0 | 4 | 0.47 | 4 | 574 | 0.17 |
| 166 | 27101 | 25923 | 53024 | 53.02 | 79.86 | 663.98 | 1 | 10 | 0.49 | 10 | 590 | 0.17 |
| 167 | 20627 | 19670 | 40297 | 40.30 | 38.87 | 1036.79 | 1 | 6 | 0.49 | 7 | 586 | 0.17 |
| 168 | 11410 | 9805 | 21215 | 21.22 | 144.22 | 147.10 | 0 | 4 | 0.46 | 2 | 554 | 0.20 |
| 169 | 3307 | 2830 | 6137 | 6.14 | 657.54 | 9.33 | 0 | 2 | 0.46 | 0 | 563 | 0.10 |
| 170 | 3072 | 2882 | 5954 | 5.95 | 740.65 | 8.04 | 0 | 4 | 0.48 | 1 | 578 | 0.10 |
| 171 | 99901 | 100881 | 200782 | 200.78 | 46.83 | 4287.09 | 1 | 102 | 0.50 | 71 | 1098 | 0.08 |
| 172 | 14930 | 12845 | 27775 | 27.78 | 125.52 | 221.28 | 0 | 12 | 0.46 | 10 | 605 | 0.22 |
| 173 | 17588 | 15439 | 33027 | 33.03 | 72.19 | 457.49 | 1 | 8 | 0.47 | 9 | 629 | 0.20 |
| 174 | 48870 | 48230 | 97100 | 97.10 | 53.51 | 1814.50 | 1 | 44 | 0.50 | 30 | 697 | 0.14 |
| 175 | 39990 | 38981 | 78971 | 78.97 | 58.43 | 1351.54 | 1 | 20 | 0.49 | 29 | 647 | 0.13 |
| 176 | 6808 | 5739 | 12547 | 12.55 | 66.35 | 189.10 | 0 | 1 | 0.46 | 3 | 586 | 0.23 |
| 177 | 29477 | 28034 | 57511 | 57.51 | 46.35 | 1240.81 | 1 | 18 | 0.49 | 17 | 676 | 0.12 |
| 178 | 10502 | 9370 | 19872 | 19.87 | 40.79 | 487.23 | 1 | 2 | 0.47 | 5 | 657 | 0.18 |
| 179 | 7954 | 6665 | 14619 | 14.62 | 64.79 | 225.65 | 0 | 1 | 0.46 | 2 | 754 | 0.16 |
| 180 | 4932 | 4103 | 9035 | 9.04 | 50.67 | 178.32 | 0 | 2 | 0.45 | 2 | 589 | 0.22 |
| 181 | 2974 | 2429 | 5403 | 5.40 | 46.80 | 115.45 | 0 | 1 | 0.45 | 1 | 602 | 0.27 |
| 182 | 5019 | 4627 | 9646 | 9.65 | 527.58 | 18.28 | 0 | 3 | 0.48 | 1 | 563 | 0.09 |
| 183 | 2431 | 2056 | 4487 | 4.49 | 227.73 | 19.70 | 0 | 2 | 0.46 | 0 | 567 | 0.13 |
| 184 | 43658 | 44013 | 87671 | 87.67 | 37.89 | 2313.96 | 1 | 54 | 0.50 | 42 | 658 | 0.18 |
| 185 | 52613 | 51828 | 104441 | 104.44 | 53.32 | 1958.74 | 1 | 33 | 0.50 | 38 | 659 | 0.14 |
| 186 | 23223 | 21339 | 44562 | 44.56 | 68.25 | 652.95 | 1 | 14 | 0.48 | 19 | 543 | 0.17 |
| 187 | 17476 | 15585 | 33061 | 33.06 | 107.85 | 306.55 | 1 | 9 | 0.47 | 10 | 558 | 0.21 |
| 188 | 43985 | 43205 | 87190 | 87.19 | 37.56 | 2321.40 | 1 | 28 | 0.50 | 36 | 676 | 0.13 |
| 189 | 18625 | 16596 | 35221 | 35.22 | 75.81 | 464.61 | 1 | 10 | 0.47 | 15 | 580 | 0.19 |
| 190 | 8471 | 7725 | 16196 | 16.20 | 76.32 | 212.22 | 0 | 5 | 0.48 | 7 | 559 | 0.22 |
| 191 | 7402 | 6482 | 13884 | 13.88 | 90.84 | 152.84 | 0 | 3 | 0.47 | 6 | 567 | 0.22 |
| 192 | 16894 | 15503 | 32397 | 32.40 | 71.45 | 453.41 | 1 | 7 | 0.48 | 11 | 627 | 0.18 |
| 193 | 9182 | 8097 | 17279 | 17.28 | 78.38 | 220.45 | 0 | 5 | 0.47 | 5 | 602 | 0.20 |
| 194 | 5271 | 4302 | 9573 | 9.57 | 165.49 | 57.85 | 0 | 4 | 0.45 | 0 | 556 | 0.22 |
| 195 | 5424 | 4816 | 10240 | 10.24 | 52.50 | 195.03 | 0 | 5 | 0.47 | 1 | 583 | 0.22 |
| 196 | 8282 | 7383 | 15665 | 15.67 | 69.34 | 225.91 | 0 | 4 | 0.47 | 3 | 591 | 0.18 |
| 197 | 3778 | 2951 | 6729 | 6.73 | 41.08 | 163.82 | 0 | 2 | 0.44 | 2 | 612 | 0.25 |
| 198 | 6458 | 5719 | 12177 | 12.18 | 48.00 | 253.70 | 0 | 2 | 0.47 | 1 | 597 | 0.19 |
| 199 | 3475 | 2889 | 6364 | 6.36 | 52.30 | 121.69 | 0 | 1 | 0.45 | 3 | 569 | 0.23 |
| 200 | 2312 | 1846 | 4158 | 4.16 | 79.43 | 52.35 | 0 | 1 | 0.44 | 1 | 569 | 0.29 |
| 201 | 3109 | 2673 | 5782 | 5.78 | 614.51 | 9.41 | 0 | 3 | 0.46 | 0 | 587 | 0.15 |
| 202 | 113783 | 117534 | 231317 | 231.32 | 65.69 | 3521.09 | 1 | 137 | 0.51 | 100 | 615 | 0.16 |
| 203 | 61519 | 62744 | 124263 | 124.26 | 40.04 | 3103.63 | 1 | 94 | 0.50 | 56 | 607 | 0.16 |
| 204 | 43888 | 42662 | 86550 | 86.55 | 39.46 | 2193.22 | 1 | 33 | 0.49 | 28 | 564 | 0.15 |
| 205 | 45873 | 44222 | 90095 | 90.10 | 39.93 | 2256.07 | 1 | 34 | 0.49 | 26 | 567 | 0.14 |
| 206 | 16752 | 16606 | 33358 | 33.36 | 19.25 | 1732.46 | 1 | 23 | 0.50 | 20 | 588 | 0.17 |
| 207 | 27729 | 27085 | 54814 | 54.81 | 32.06 | 1709.77 | 1 | 35 | 0.49 | 34 | 577 | 0.15 |
| 208 | 20870 | 19847 | 40717 | 40.72 | 34.61 | 1176.60 | 1 | 17 | 0.49 | 19 | 591 | 0.19 |
| 209 | 25440 | 24247 | 49687 | 49.69 | 92.85 | 535.14 | 1 | 19 | 0.49 | 28 | 585 | 0.20 |
| 210 | 8568 | 8097 | 16665 | 16.67 | 18.09 | 921.45 | 1 | 3 | 0.49 | 2 | 541 | 0.15 |
| 211 | 19091 | 18649 | 37740 | 37.74 | 22.33 | 1690.35 | 1 | 7 | 0.49 | 14 | 535 | 0.13 |
| 212 | 24174 | 22225 | 46399 | 46.40 | 49.89 | 929.96 | 1 | 6 | 0.48 | 7 | 534 | 0.16 |
| 213 | 20022 | 18850 | 38872 | 38.87 | 29.34 | 1324.67 | 1 | 13 | 0.48 | 16 | 569 | 0.14 |
| 214 | 23206 | 22026 | 45232 | 45.23 | 36.35 | 1244.45 | 1 | 17 | 0.49 | 14 | 558 | 0.15 |
| 215 | 12211 | 10977 | 23188 | 23.19 | 38.02 | 609.88 | 1 | 4 | 0.47 | 6 | 541 | 0.19 |
| 216 | 19681 | 18776 | 38457 | 38.46 | 30.78 | 1249.27 | 1 | 6 | 0.49 | 9 | 567 | 0.15 |
| 217 | 16785 | 15134 | 31919 | 31.92 | 38.61 | 826.74 | 1 | 5 | 0.47 | 4 | 541 | 0.18 |
| 218 | 17705 | 16746 | 34451 | 34.45 | 20.95 | 1644.24 | 1 | 6 | 0.49 | 6 | 550 | 0.16 |
| 219 | 18761 | 17539 | 36300 | 36.30 | 20.64 | 1758.87 | 1 | 9 | 0.48 | 13 | 558 | 0.17 |
| 220 | 21799 | 20637 | 42436 | 42.44 | 36.14 | 1174.05 | 1 | 14 | 0.49 | 14 | 558 | 0.17 |
| 221 | 7734 | 6908 | 14642 | 14.64 | 29.44 | 497.27 | 1 | 5 | 0.47 | 6 | 578 | 0.24 |
| 222 | 13795 | 12896 | 26691 | 26.69 | 24.04 | 1110.39 | 1 | 4 | 0.48 | 8 | 548 | 0.18 |
| 223 | 15490 | 14582 | 30072 | 30.07 | 42.75 | 703.43 | 1 | 8 | 0.48 | 6 | 566 | 0.19 |
| 224 | 17286 | 15434 | 32720 | 32.72 | 91.38 | 358.05 | 1 | 4 | 0.47 | 5 | 533 | 0.22 |
| 225 | 8701 | 7418 | 16119 | 16.12 | 63.74 | 252.88 | 0 | 3 | 0.46 | 2 | 562 | 0.26 |
| 226 | 7744 | 7064 | 14808 | 14.81 | 42.17 | 351.18 | 1 | 5 | 0.48 | 4 | 591 | 0.23 |
| 227 | 15224 | 13934 | 29158 | 29.16 | 75.83 | 384.51 | 1 | 6 | 0.48 | 9 | 561 | 0.21 |
| 228 | 49530 | 49551 | 99081 | 99.08 | 71.60 | 1383.77 | 1 | 55 | 0.50 | 35 | 598 | 0.17 |
| 229 | 39307 | 39884 | 79191 | 79.19 | 162.22 | 488.16 | 1 | 51 | 0.50 | 48 | 540 | 0.18 |
| 230 | 49092 | 48397 | 97489 | 97.49 | 104.03 | 937.10 | 1 | 56 | 0.50 | 52 | 592 | 0.17 |
| 231 | 27307 | 26157 | 53464 | 53.46 | 247.33 | 216.16 | 0 | 28 | 0.49 | 37 | 557 | 0.20 |
| 232 | 5483 | 4978 | 10461 | 10.46 | 49.73 | 210.37 | 0 | 3 | 0.48 | 6 | 588 | 0.23 |
| 233 | 19748 | 17759 | 37507 | 37.51 | 83.10 | 451.37 | 1 | 10 | 0.47 | 10 | 552 | 0.20 |
| 234 | 9202 | 8029 | 17231 | 17.23 | 141.90 | 121.43 | 0 | 4 | 0.47 | 6 | 573 | 0.24 |
| 235 | 7804 | 6497 | 14301 | 14.30 | 146.65 | 97.52 | 0 | 4 | 0.45 | 1 | 520 | 0.24 |
| 236 | 8150 | 7316 | 15466 | 15.47 | 121.37 | 127.42 | 0 | 4 | 0.47 | 4 | 511 | 0.22 |
| 237 | 9680 | 8285 | 17965 | 17.97 | 175.70 | 102.25 | 0 | 4 | 0.46 | 10 | 502 | 0.22 |
| 238 | 8907 | 8073 | 16980 | 16.98 | 106.84 | 158.93 | 0 | 11 | 0.48 | 12 | 539 | 0.23 |
| 239 | 8499 | 7379 | 15878 | 15.88 | 1422.42 | 11.16 | 0 | 7 | 0.46 | 0 | 598 | 0.13 |
| 240 | 8116 | 7702 | 15818 | 15.82 | 1273.53 | 12.42 | 0 | 5 | 0.49 | 1 | 589 | 0.12 |
| 241 | 53879 | 54798 | 108677 | 108.68 | 93.72 | 1159.65 | 1 | 67 | 0.50 | 44 | 633 | 0.15 |
| 242 | 22397 | 21757 | 44154 | 44.15 | 48.15 | 917.00 | 1 | 18 | 0.49 | 23 | 595 | 0.19 |
| 243 | 35826 | 35073 | 70899 | 70.90 | 68.74 | 1031.38 | 1 | 49 | 0.49 | 48 | 658 | 0.16 |
| 244 | 22856 | 22607 | 45463 | 45.46 | 49.80 | 912.94 | 1 | 22 | 0.50 | 32 | 604 | 0.19 |
| 245 | 14755 | 13550 | 28305 | 28.31 | 49.02 | 577.40 | 1 | 5 | 0.48 | 13 | 602 | 0.21 |
| 246 | 20227 | 18862 | 39089 | 39.09 | 41.50 | 941.91 | 1 | 29 | 0.48 | 26 | 608 | 0.20 |
| 247 | 16251 | 14617 | 30868 | 30.87 | 166.61 | 185.28 | 0 | 7 | 0.47 | 11 | 569 | 0.22 |
| 248 | 9907 | 8697 | 18604 | 18.60 | 45.00 | 413.45 | 1 | 2 | 0.47 | 5 | 560 | 0.22 |
| 249 | 14763 | 13548 | 28311 | 28.31 | 50.85 | 556.75 | 1 | 8 | 0.48 | 12 | 575 | 0.19 |
| 250 | 9124 | 8310 | 17434 | 17.43 | 37.60 | 463.63 | 1 | 5 | 0.48 | 4 | 552 | 0.20 |
| 251 | 13925 | 12104 | 26029 | 26.03 | 59.56 | 437.00 | 1 | 5 | 0.47 | 6 | 591 | 0.23 |
| 252 | 12540 | 11244 | 23784 | 23.78 | 58.48 | 406.68 | 1 | 10 | 0.47 | 11 | 603 | 0.22 |
| 253 | 23810 | 24141 | 47951 | 47.95 | 80.17 | 598.14 | 1 | 12 | 0.50 | 16 | 675 | 0.12 |
| 254 | 7857 | 6298 | 14155 | 14.16 | 48.36 | 292.72 | 0 | 4 | 0.44 | 7 | 595 | 0.24 |
| 255 | 6716 | 5761 | 12477 | 12.48 | 37.06 | 336.71 | 1 | 4 | 0.46 | 7 | 591 | 0.22 |
| 256 | 12322 | 10690 | 23012 | 23.01 | 54.10 | 425.37 | 1 | 5 | 0.46 | 3 | 611 | 0.21 |
| 257 | 13526 | 11168 | 24694 | 24.69 | 71.59 | 344.95 | 1 | 5 | 0.45 | 7 | 579 | 0.26 |
| 258 | 12202 | 10185 | 22387 | 22.39 | 77.12 | 290.29 | 0 | 6 | 0.45 | 12 | 591 | 0.23 |
| 259 | 14081 | 12322 | 26403 | 26.40 | 80.46 | 328.15 | 1 | 7 | 0.47 | 10 | 556 | 0.20 |
| 260 | 13173 | 11004 | 24177 | 24.18 | 72.96 | 331.38 | 1 | 5 | 0.46 | 11 | 575 | 0.26 |
| 261 | 19668 | 18868 | 38536 | 38.54 | 66.90 | 576.05 | 1 | 14 | 0.49 | 15 | 664 | 0.14 |
| 262 | 20994 | 20675 | 41669 | 41.67 | 49.57 | 840.55 | 1 | 28 | 0.50 | 19 | 646 | 0.19 |
| 263 | 13272 | 12718 | 25990 | 25.99 | 61.73 | 421.02 | 1 | 8 | 0.49 | 6 | 586 | 0.22 |
| 264 | 15471 | 14910 | 30381 | 30.38 | 64.17 | 473.47 | 1 | 13 | 0.49 | 14 | 600 | 0.22 |
| 265 | 36435 | 34882 | 71317 | 71.32 | 85.50 | 834.15 | 1 | 33 | 0.49 | 34 | 606 | 0.16 |
| 266 | 7501 | 6554 | 14055 | 14.06 | 33.05 | 425.31 | 1 | 5 | 0.47 | 7 | 548 | 0.25 |
| 267 | 16440 | 14722 | 31162 | 31.16 | 66.05 | 471.80 | 1 | 11 | 0.47 | 9 | 629 | 0.22 |
| 268 | 11759 | 10437 | 22196 | 22.20 | 62.26 | 356.49 | 1 | 3 | 0.47 | 3 | 580 | 0.27 |
| 269 | 12566 | 11200 | 23766 | 23.77 | 81.58 | 291.31 | 0 | 5 | 0.47 | 1 | 547 | 0.24 |
| 270 | 9176 | 8426 | 17602 | 17.60 | 79.29 | 221.99 | 0 | 4 | 0.48 | 4 | 576 | 0.27 |
| 271 | 8012 | 6901 | 14913 | 14.91 | 54.32 | 274.56 | 0 | 3 | 0.46 | 3 | 584 | 0.27 |
| 272 | 25304 | 23708 | 49012 | 49.01 | 69.12 | 709.09 | 1 | 11 | 0.48 | 16 | 586 | 0.19 |
| 273 | 22862 | 21269 | 44131 | 44.13 | 129.50 | 340.78 | 1 | 13 | 0.48 | 15 | 568 | 0.19 |
| 274 | 18509 | 16288 | 34797 | 34.80 | 162.23 | 214.50 | 0 | 12 | 0.47 | 15 | 558 | 0.21 |
| 275 | 9920 | 8767 | 18687 | 18.69 | 119.76 | 156.04 | 0 | 4 | 0.47 | 8 | 591 | 0.24 |
| 276 | 6012 | 5168 | 11180 | 11.18 | 117.53 | 95.13 | 0 | 2 | 0.46 | 1 | 544 | 0.21 |
| 277 | 2334 | 2226 | 4560 | 4.56 | 173.25 | 26.32 | 0 | 0 | 0.49 | 0 | 557 | 0.19 |
| 278 | 2903 | 2624 | 5527 | 5.53 | 427.85 | 12.92 | 0 | 2 | 0.47 | 1 | 591 | 0.16 |
| 279 | 97245 | 100402 | 197647 | 197.65 | 65.07 | 3037.59 | 1 | 146 | 0.51 | 117 | 626 | 0.17 |
| 280 | 26768 | 27074 | 53842 | 53.84 | 42.43 | 1268.87 | 1 | 46 | 0.50 | 35 | 611 | 0.17 |
| 281 | 23548 | 23183 | 46731 | 46.73 | 29.46 | 1586.06 | 1 | 25 | 0.50 | 22 | 576 | 0.16 |
| 282 | 15560 | 14854 | 30414 | 30.41 | 136.76 | 222.38 | 0 | 11 | 0.49 | 10 | 534 | 0.16 |
| 283 | 25980 | 24146 | 50126 | 50.13 | 57.47 | 872.24 | 1 | 16 | 0.48 | 16 | 595 | 0.17 |
| 284 | 15310 | 14160 | 29470 | 29.47 | 39.89 | 738.85 | 1 | 6 | 0.48 | 10 | 617 | 0.18 |
| 285 | 5579 | 5191 | 10770 | 10.77 | 16.26 | 662.36 | 1 | 2 | 0.48 | 5 | 569 | 0.22 |
| 286 | 11272 | 10690 | 21962 | 21.96 | 42.02 | 522.67 | 1 | 6 | 0.49 | 5 | 583 | 0.17 |
| 287 | 13039 | 12668 | 25707 | 25.71 | 68.92 | 372.99 | 1 | 9 | 0.49 | 5 | 595 | 0.18 |
| 288 | 12958 | 12041 | 24999 | 25.00 | 64.35 | 388.49 | 1 | 7 | 0.48 | 7 | 560 | 0.18 |
| 289 | 12622 | 11153 | 23775 | 23.78 | 90.15 | 263.72 | 0 | 13 | 0.47 | 10 | 535 | 0.25 |
| 290 | 10494 | 9695 | 20189 | 20.19 | 60.73 | 332.43 | 1 | 4 | 0.48 | 9 | 589 | 0.21 |
| 291 | 27445 | 25885 | 53330 | 53.33 | 81.86 | 651.51 | 1 | 22 | 0.49 | 23 | 585 | 0.19 |
| 292 | 8811 | 7804 | 16615 | 16.62 | 29.07 | 571.49 | 1 | 3 | 0.47 | 1 | 595 | 0.22 |
| 293 | 5093 | 4468 | 9561 | 9.56 | 59.01 | 162.02 | 0 | 2 | 0.47 | 2 | 570 | 0.23 |
| 294 | 12378 | 11302 | 23680 | 23.68 | 57.73 | 410.15 | 1 | 7 | 0.48 | 8 | 587 | 0.21 |
| 295 | 17592 | 16347 | 33939 | 33.94 | 38.31 | 885.88 | 1 | 5 | 0.48 | 11 | 585 | 0.18 |
| 296 | 7712 | 7666 | 15378 | 15.38 | 31.27 | 491.85 | 1 | 3 | 0.50 | 2 | 573 | 0.17 |
| 297 | 8814 | 8461 | 17275 | 17.28 | 15.62 | 1105.72 | 1 | 7 | 0.49 | 6 | 579 | 0.22 |
| 298 | 5317 | 5047 | 10364 | 10.36 | 18.97 | 546.34 | 1 | 5 | 0.49 | 3 | 595 | 0.23 |
| 299 | 9648 | 8972 | 18620 | 18.62 | 30.98 | 600.95 | 1 | 6 | 0.48 | 3 | 569 | 0.22 |
| 300 | 6632 | 5489 | 12121 | 12.12 | 6.80 | 1782.03 | 1 | 4 | 0.45 | 3 | 576 | 0.17 |
| 301 | 4427 | 3851 | 8278 | 8.28 | 49.85 | 166.05 | 1 | 2 | 0.47 | 1 | 529 | 0.22 |
| 302 | 4063 | 3408 | 7471 | 7.47 | 142.20 | 52.54 | 0 | 3 | 0.46 | 1 | 532 | 0.20 |
| 303 | 2758 | 2482 | 5240 | 5.24 | 17.27 | 303.42 | 1 | 3 | 0.47 | 2 | 541 | 0.20 |
| 304 | 3882 | 3807 | 7689 | 7.69 | 196.40 | 39.15 | 0 | 2 | 0.50 | 0 | 594 | 0.12 |
| 305 | 1671 | 1576 | 3247 | 3.25 | 278.80 | 11.65 | 0 | 1 | 0.49 | 0 | 598 | 0.15 |
| 306 | 3423 | 3345 | 6768 | 6.77 | 78.70 | 86.00 | 0 | 9 | 0.49 | 0 | 609 | 0.12 |
| 307 | 2797 | 2554 | 5351 | 5.35 | 118.63 | 45.11 | 0 | 3 | 0.48 | 0 | 638 | 0.11 |
| 308 | 3725 | 3723 | 7448 | 7.45 | 167.78 | 44.39 | 0 | 3 | 0.50 | 0 | 600 | 0.12 |
| 309 | 2525 | 2422 | 4947 | 4.95 | 160.00 | 30.92 | 0 | 6 | 0.49 | 1 | 631 | 0.12 |
| 310 | 2481 | 2358 | 4839 | 4.84 | 301.00 | 16.08 | 0 | 1 | 0.49 | 0 | 614 | 0.13 |
| 311 | 2437 | 2428 | 4865 | 4.87 | 181.84 | 26.75 | 0 | 1 | 0.50 | 0 | 616 | 0.14 |
| 312 | 52253 | 52550 | 104803 | 104.80 | 109.77 | 954.76 | 1 | 53 | 0.50 | 44 | 615 | 0.16 |
| 313 | 7095 | 6410 | 13505 | 13.51 | 143.99 | 93.79 | 0 | 4 | 0.47 | 3 | 546 | 0.21 |
| 314 | 4348 | 4072 | 8420 | 8.42 | 58.74 | 143.36 | 0 | 5 | 0.48 | 2 | 578 | 0.21 |
| 315 | 8914 | 8047 | 16961 | 16.96 | 412.69 | 41.10 | 0 | 3 | 0.47 | 3 | 546 | 0.18 |
| 316 | 2982 | 2745 | 5727 | 5.73 | 69.15 | 82.83 | 0 | 2 | 0.48 | 2 | 553 | 0.17 |
| 317 | 5795 | 5130 | 10925 | 10.93 | 96.65 | 113.03 | 0 | 5 | 0.47 | 3 | 556 | 0.20 |
| 318 | 4528 | 3675 | 8203 | 8.20 | 210.19 | 39.03 | 0 | 3 | 0.45 | 1 | 535 | 0.24 |
| 319 | 3905 | 3021 | 6926 | 6.93 | 155.19 | 44.63 | 0 | 3 | 0.44 | 1 | 520 | 0.25 |
| 320 | 4025 | 3576 | 7601 | 7.60 | 89.70 | 84.74 | 0 | 3 | 0.47 | 3 | 573 | 0.22 |
| 321 | 4174 | 3899 | 8073 | 8.07 | 82.69 | 97.64 | 0 | 5 | 0.48 | 5 | 544 | 0.23 |
| 322 | 2144 | 1882 | 4026 | 4.03 | 15.09 | 266.77 | 0 | 2 | 0.47 | 1 | 654 | 0.12 |
| 323 | 1900 | 1649 | 3549 | 3.55 | 455.88 | 7.78 | 0 | 1 | 0.46 | 0 | 614 | 0.09 |
| 324 | 2171 | 1934 | 4105 | 4.11 | 880.04 | 4.66 | 0 | 1 | 0.47 | 0 | 600 | 0.09 |
| 325 | 1891 | 1598 | 3489 | 3.49 | 306.45 | 11.39 | 0 | 1 | 0.46 | 0 | 607 | 0.13 |
| 326 | 1854 | 1845 | 3699 | 3.70 | 380.66 | 9.72 | 0 | 2 | 0.50 | 0 | 629 | 0.10 |
| 327 | 2636 | 2613 | 5249 | 5.25 | 48.39 | 108.47 | 0 | 0 | 0.50 | 0 | 615 | 0.08 |
| 328 | 49225 | 53314 | 102539 | 102.54 | 29.41 | 3486.59 | 1 | 81 | 0.52 | 59 | 603 | 0.17 |
| 329 | 5613 | 5208 | 10821 | 10.82 | 120.52 | 89.79 | 0 | 6 | 0.48 | 3 | 550 | 0.26 |
| 330 | 12403 | 10978 | 23381 | 23.38 | 252.37 | 92.65 | 0 | 7 | 0.47 | 8 | 562 | 0.22 |
| 331 | 10220 | 9838 | 20058 | 20.06 | 29.41 | 682.02 | 1 | 3 | 0.49 | 6 | 598 | 0.15 |
| 332 | 41831 | 41676 | 83507 | 83.51 | 65.26 | 1279.64 | 1 | 22 | 0.50 | 21 | 596 | 0.16 |
| 333 | 9340 | 8249 | 17589 | 17.59 | 218.44 | 80.52 | 0 | 4 | 0.47 | 5 | 534 | 0.21 |
| 334 | 6575 | 5794 | 12369 | 12.37 | 157.11 | 78.73 | 0 | 4 | 0.47 | 4 | 530 | 0.24 |
| 335 | 2454 | 1922 | 4376 | 4.38 | 162.43 | 26.94 | 0 | 0 | 0.44 | 0 | 496 | 0.22 |
| 336 | 6059 | 5253 | 11312 | 11.31 | 135.59 | 83.43 | 0 | 4 | 0.46 | 2 | 537 | 0.23 |
| 337 | 5436 | 4568 | 10004 | 10.00 | 176.37 | 56.72 | 0 | 1 | 0.46 | 0 | 530 | 0.25 |
| 338 | 8300 | 7843 | 16143 | 16.14 | 1641.86 | 9.83 | 0 | 10 | 0.49 | 0 | 546 | 0.09 |
| 339 | 3291 | 2946 | 6237 | 6.24 | 618.49 | 10.08 | 0 | 3 | 0.47 | 0 | 526 | 0.10 |
| 340 | 3279 | 2757 | 6036 | 6.04 | 1021.31 | 5.91 | 0 | 3 | 0.46 | 0 | 572 | 0.10 |
| 341 | 32122 | 31084 | 63206 | 63.21 | 33.99 | 1859.45 | 1 | 40 | 0.49 | 15 | 742 | 0.15 |
| 342 | 8069 | 7161 | 15230 | 15.23 | 33.30 | 457.35 | 1 | 2 | 0.47 | 1 | 697 | 0.18 |
| 343 | 5118 | 4789 | 9907 | 9.91 | 20.09 | 493.19 | 1 | 6 | 0.48 | 0 | 674 | 0.19 |
| 344 | 4308 | 4045 | 8353 | 8.35 | 18.71 | 446.33 | 1 | 4 | 0.48 | 1 | 633 | 0.22 |
| 345 | 2909 | 2462 | 5371 | 5.37 | 13.78 | 389.70 | 1 | 2 | 0.46 | 0 | 687 | 0.21 |
| 346 | 1990 | 1895 | 3885 | 3.89 | 6.99 | 556.05 | 1 | 0 | 0.49 | 0 | 683 | 0.18 |
| 347 | 26007 | 25217 | 51224 | 51.22 | 10.21 | 5016.16 | 1 | 42 | 0.49 | 26 | 583 | 0.19 |
| 348 | 26829 | 26786 | 53615 | 53.62 | 56.27 | 952.89 | 1 | 16 | 0.50 | 13 | 584 | 0.16 |
| 349 | 19263 | 19285 | 38548 | 38.55 | 22.83 | 1688.61 | 1 | 6 | 0.50 | 11 | 600 | 0.15 |
| 350 | 21097 | 21690 | 42787 | 42.79 | 4.23 | 10106.77 | 1 | 53 | 0.51 | 25 | 598 | 0.21 |
| 351 | 23545 | 22914 | 46459 | 46.46 | 10.52 | 4414.66 | 1 | 17 | 0.49 | 18 | 591 | 0.18 |
| 352 | 40450 | 41326 | 81776 | 81.78 | 18.03 | 4536.81 | 1 | 17 | 0.51 | 14 | 645 | 0.16 |
| 353 | 26113 | 27055 | 53168 | 53.17 | 10.67 | 4982.66 | 1 | 14 | 0.51 | 12 | 621 | 0.18 |
| 354 | 108334 | 111722 | 220056 | 220.06 | 33.58 | 6553.81 | 1 | 77 | 0.51 | 91 | 938 | 0.12 |
| 355 | 74376 | 78236 | 152612 | 152.61 | 15.73 | 9704.01 | 1 | 115 | 0.51 | 52 | 704 | 0.15 |
| 356 | 40007 | 38737 | 78744 | 78.74 | 54.85 | 1435.65 | 1 | 17 | 0.49 | 9 | 686 | 0.13 |
| 357 | 57332 | 62383 | 119715 | 119.72 | 30.16 | 3969.91 | 1 | 94 | 0.52 | 59 | 663 | 0.17 |
| 358 | 71338 | 74952 | 146290 | 146.29 | 29.87 | 4897.56 | 1 | 117 | 0.51 | 59 | 632 | 0.15 |
| 359 | 21476 | 21524 | 43000 | 43.00 | 21.71 | 1980.38 | 1 | 21 | 0.50 | 8 | 753 | 0.15 |
| 360 | 15228 | 15172 | 30400 | 30.40 | 41.70 | 729.09 | 1 | 4 | 0.50 | 3 | 757 | 0.14 |
| 361 | 10207 | 10525 | 20732 | 20.73 | 41.19 | 503.33 | 1 | 2 | 0.51 | 1 | 714 | 0.17 |
| 362 | 16603 | 16467 | 33070 | 33.07 | 29.85 | 1107.72 | 1 | 3 | 0.50 | 0 | 726 | 0.12 |
| 363 | 6329 | 6404 | 12733 | 12.73 | 16.00 | 795.66 | 1 | 2 | 0.50 | 0 | 713 | 0.16 |
| 364 | 340 | 322 | 662 | 0.66 | 1.20 | 551.67 | 1 | 0 | 0.49 | 0 | 838 | 0.11 |
| 365 | 4308 | 3330 | 7638 | 7.64 | 10.40 | 734.42 | 1 | 0 | 0.44 | 0 | 827 | 0.12 |
| 366 | 1564 | 1153 | 2717 | 2.72 | 9.90 | 274.44 | 0 | 1 | 0.42 | 0 | 723 | 0.14 |
| 367 | 922 | 567 | 1489 | 1.49 | 4.70 | 316.81 | 1 | 2 | 0.38 | 0 | 756 | 0.15 |
| 368 | 874 | 561 | 1435 | 1.44 | 3.80 | 377.63 | 1 | 1 | 0.39 | 0 | 940 | 0.09 |

Code book

| Variable | Meaning |
| --- | --- |
| District | Code of district |
| Male | Number of male population |
| Female | Number of female population |
| total | Number of total population |
| totperthous | Number of total population in thousand |
| area | Area of the district in square kilometer |
| density | Density of the district |
| Urban | Urban = 1; rural = 0 |
| clinic | Number of physician offices |
| feprop | Proportion of female population |
| pharmacy | Number of community pharmacies |
| Income | Median household income in thousand New Taiwan Dollars |
| older | Proportion of people at least 65 years |
